# Supplementary material for: Higher ambient synaptic glutamate at inhibitory versus excitatory neurons differentially impacts NMDA receptor activity
Source: PubMed Central journal article supplement (PMC6167324; doi:10.1038/s41467-018-06512-7), 2018-10-01
Supplement: 41467_2018_6512_MOESM1_ESM.pdf [file 41467_2018_6512_MOESM1_ESM.pdf]

**Higher ambient synaptic glutamate at inhibitory versus excitatory neurons  
differentially impacts NMDA receptor activity**

**Yao et al.**

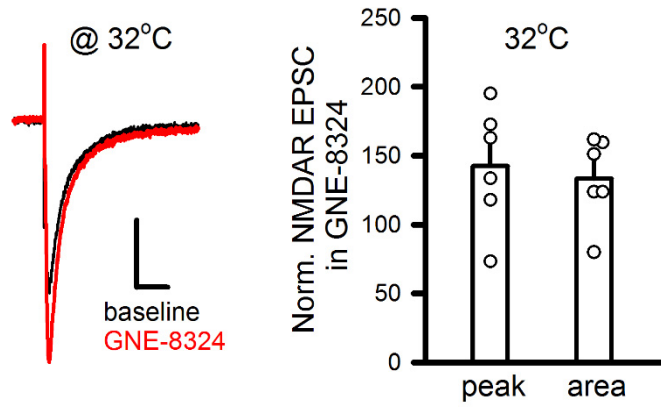

***Supplementary Figure 1. Potentiation of NMDAR EPSCs by GNE-8324 at 32 °C.***

N=6, 142.6±17.86% (peak), 133.3±12.7% (area). Error bars represent SEM.

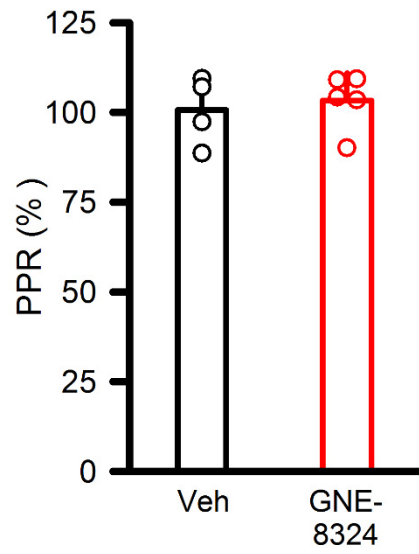

***Supplementary Figure 2. No effect of GNE-8324 on the paired-pulse ratio (PPR) of AMPAR-EPSCs.***

N=4, 5, for Veh and GNE-8324, 100.6±4.77% (Veh), 103.2±3.49% (GNE-8324). P=0.67, unpaired t-test. Error bars represent SEM.

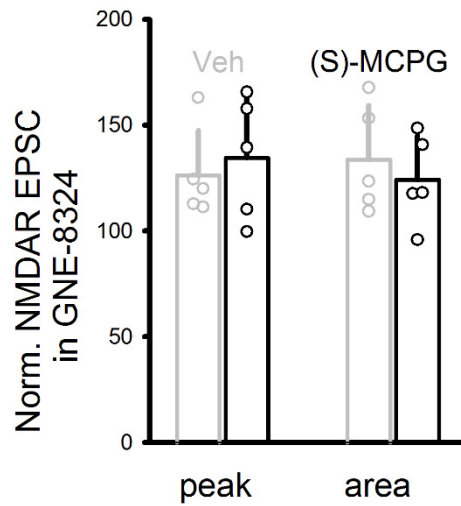

***Supplementary Figure 3. GNE-8324 potentiation of NMDAR EPSCs in inhibitory neurons was not affected by (S)-MCPG.***

N=5, 5, for (S)-MCPG and Veh. For peak, 126.3±9.48% (Veh), 134.5±12.91% ((S)-MCPG); for area, 133.7±11.38% (Veh), 124.1±9.34% ((S)-MCPG). P (peak) =0.62, P (area) =0.53, unpaired t-test. Error bars represent SEM.

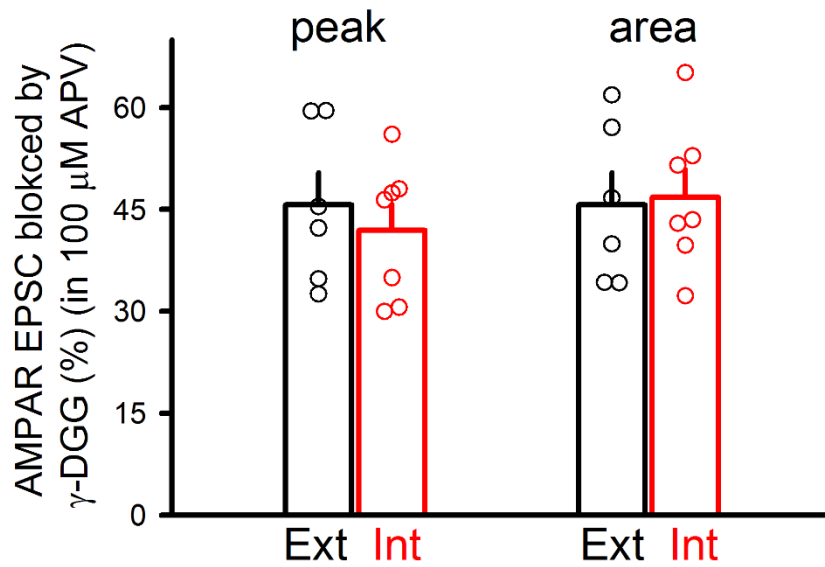

***Supplementary Figure 4. Effects of  $\gamma$ -DGG (0.4 mM) on AMPAR EPSCs in excitatory and inhibitory neurons in the presence of high concentration of D-APV.***

No difference was found between either peak or area of AMPAR EPSCs in 100  $\mu$ M D-APV. N = 6, 7 for excitatory and inhibitory neurons. For peak, 45.66 $\pm$ 4.78% (Ext), 41.92 $\pm$ 3.80% (Int); for area, 45.66 $\pm$ 4.78% (Ext), 46.84 $\pm$ 4.03 (Int). P (peak) =0.54, P (area) =0.85, unpaired t-test. Error bars represent SEM.

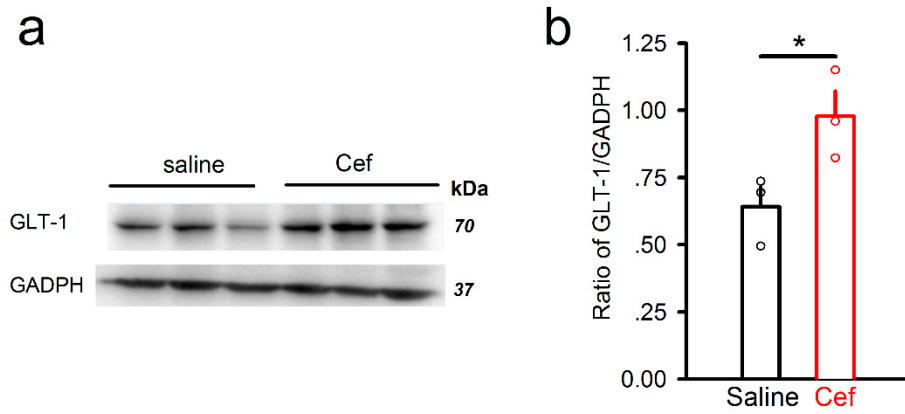

***Supplementary Figure 5. Injection of ceftriaxone led to elevated expression of GLT-1.***

a. Sample Western Blot image of GLT-1 levels in mice injected with either ceftriaxone (Cef) or vehicle for 5 consecutive days (Molecular weight, GLT-1, 70k Da; GADPH, 37k Da).

b. Quantification of the WB results (N = 3 mice each), 0.64±0.074 (Saline), 0.98±0.095 (Cef). \*, P < 0.05, unpaired t-test. Error bars represent SEM.

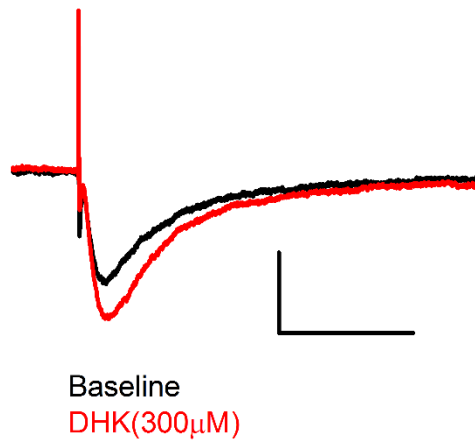

***Supplementary Figure 6. DHK affects NMDAR EPSCs.***

Sample traces of NMDAR EPSCs before and after application of DHK in an excitatory neuron.

Scale bars, 50 pA/100 ms.

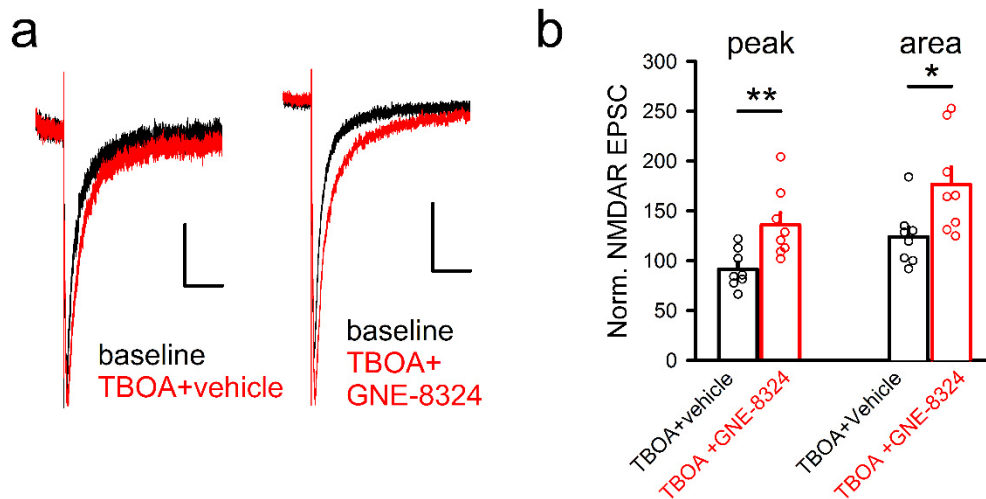

**Supplementary Figure 7. TBOA enabled GNE-8324 potentiation of NMDAR EPSCs in excitatory neurons.**

a. Sample traces of NMDAR EPSCs in response to bath application of either TBOA (10  $\mu$ M) or TBOA+GNE8324. Scale bars, 10 pA/200 msec (left); 20 pA/200 msec (right).

b. Significant potentiation of GNE-8324 on NMDAR EPSCs in the presence of TBOA.  $P = 8, 8$  for TBOA and TBOA+GNE-8324. For peak,  $91.46 \pm 6.70\%$  (TBOA+vehicle),  $135.8 \pm 12.25\%$  (TBOA+GNE-8324); for area,  $123.9 \pm 10.24\%$  (TBOA+vehicle),  $176.5 \pm 17.55$  (TBOA+GNE-8324). \*\*,  $P < 0.01$ ; \*,  $P < 0.05$ , unpaired t-test. Error bars represent SEM.



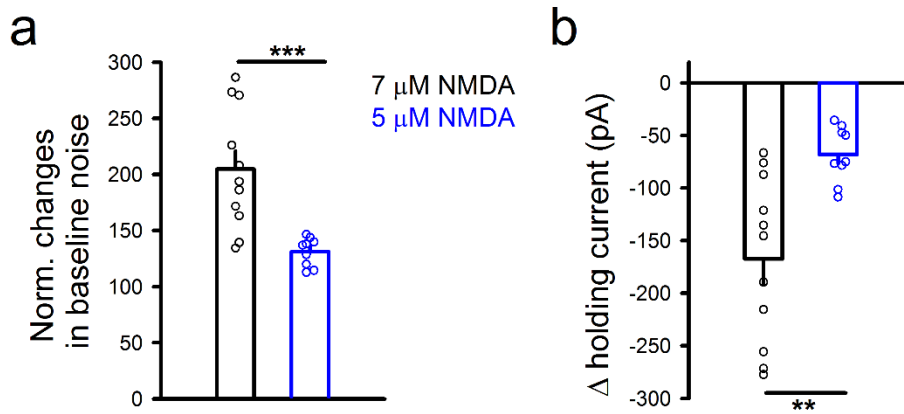

***Supplementary Figure 8. Exogenous NMDA application resulted in an increase in baseline noise and holding current.***

Quantification of the baseline noise (a) and holding current (b) in the presence of 5  $\mu$ M or 7  $\mu$ M NMDA. Both were normalized to baseline prior to NMDA application. N = 9, 11 for 5  $\mu$ M and 7  $\mu$ M NMDA. For normalized changes in baseline noise, 204.8 $\pm$ 16.17% (7 $\mu$ M NMDA), 131.2 $\pm$ 4.25% (5 $\mu$ M NMDA); for  $\Delta$ holding current, -167.4 $\pm$ 23.77pA (7 $\mu$ M NMDA), 68.1 $\pm$ 8.80pA (5 $\mu$ M NMDA). \*\*\*, P < 0.001; \*\*, P < 0.01, unpaired t-test. Error bars represent SEM.

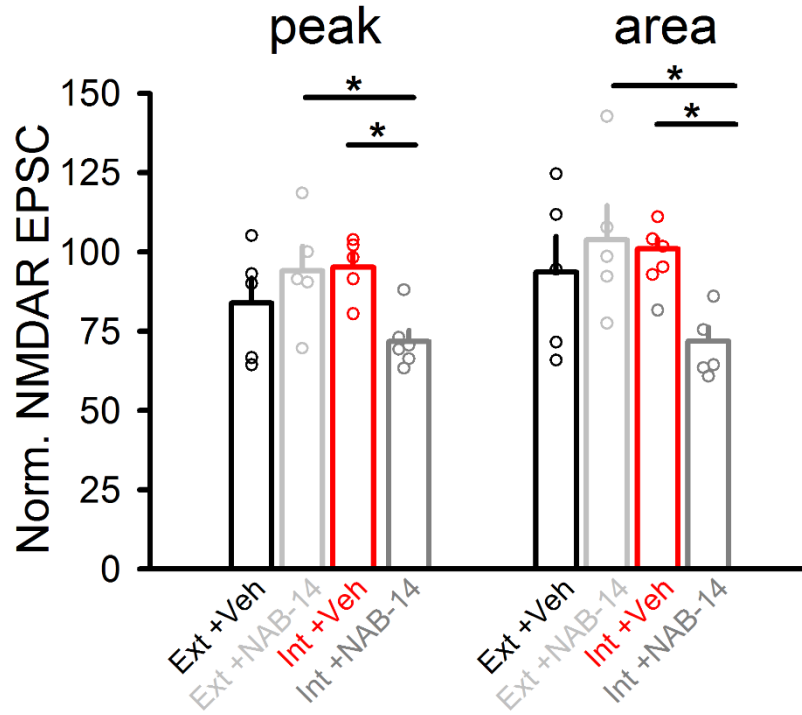

**Supplementary Figure 9. Effect of NAB-14 on NMDAR EPSCs in excitatory and inhibitory neurons.**

NAB-14 or vehicle was bath applied onto either excitatory or inhibitory neurons. NMDAR EPSCs were normalized to the pre-drug baseline level. N = 5,5,5,6 for Ext/Veh, Ext/NAB-14, Int/Veh, Int/NAB-14. P < 0.05, one-way ANOVA with Dunnett correction. Error bars represent SEM.

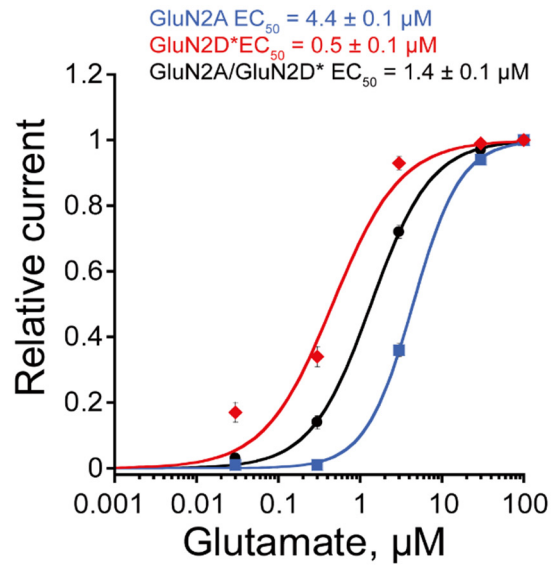

**Supplementary Figure 10. Glutamate dose-response curves for diheteromeric GluN1/2A NMDARs, diheteromeric GluN1/2D\* NMDARs or triheteromeric GluN1/2A/2D\* NMDARs.**

Glutamate  $EC_{50}$  and Hill coefficient (nH) values are, respectively:  $4.4 \pm 0.1 \mu\text{M}$  and 1.5 (N=4);  $0.5 \pm 0.1 \mu\text{M}$  and 1.0 (N=3); and  $1.4 \pm 0.1 \mu\text{M}$  and 1.2 (N=7). Error bars represent SEM.
